# Supplementary material
Source: PubMed Central journal article supplement (PMC4423384)
Supplement: 10.1534_115.174367_genetics.115.174367-6.pdf [file 10.1534_115.174367_genetics.115.174367-6.pdf]

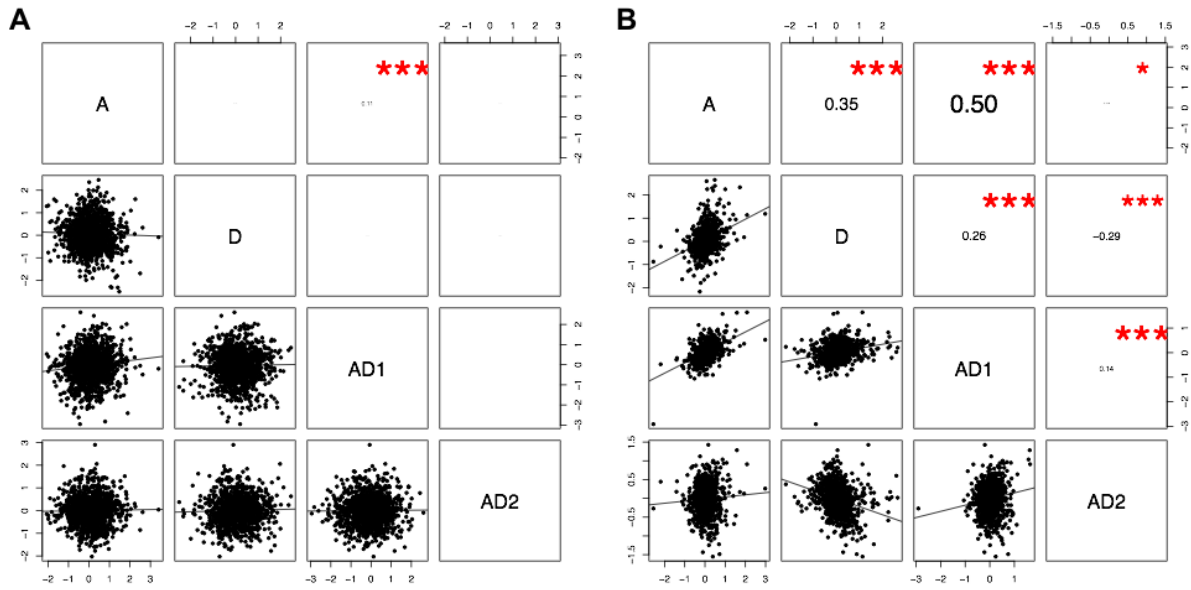

**Figure S4** Pairwise comparison of developmental expression changes among diploid and polyploid cotton. Log<sub>2</sub> expression ratios were calculated for 20 dpa versus 10 dpa within each genome using 2-DE (A) and iTRAQ datasets (B). Lower-left panels of the comparison matrix show scatterplots while upper-right panels give Pearson's correlation coefficients, with the font size proportional to the absolute value of the correlation. Asterisks indicate significance of the adjacent correlation coefficient: \* $P < 0.05$ , \*\* $P < 0.01$ , \*\*\* $P < 0.001$ .
