# Supplementary material
Source: PubMed Central journal article supplement (PMC4423384)
Supplement: 10.1534_115.174367_genetics.115.174367-11.pdf [file 10.1534_115.174367_genetics.115.174367-11.pdf]

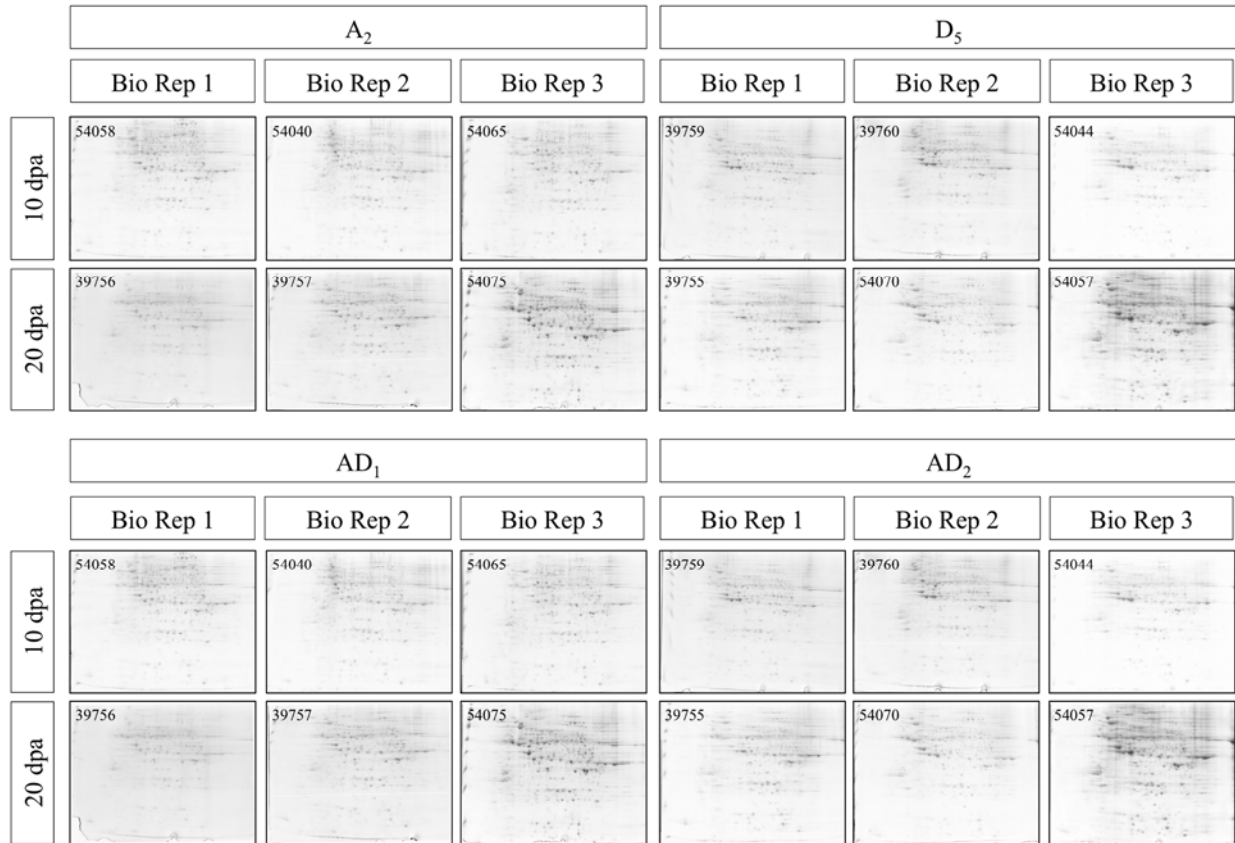

**Figure S1** Images of 2-DE gels

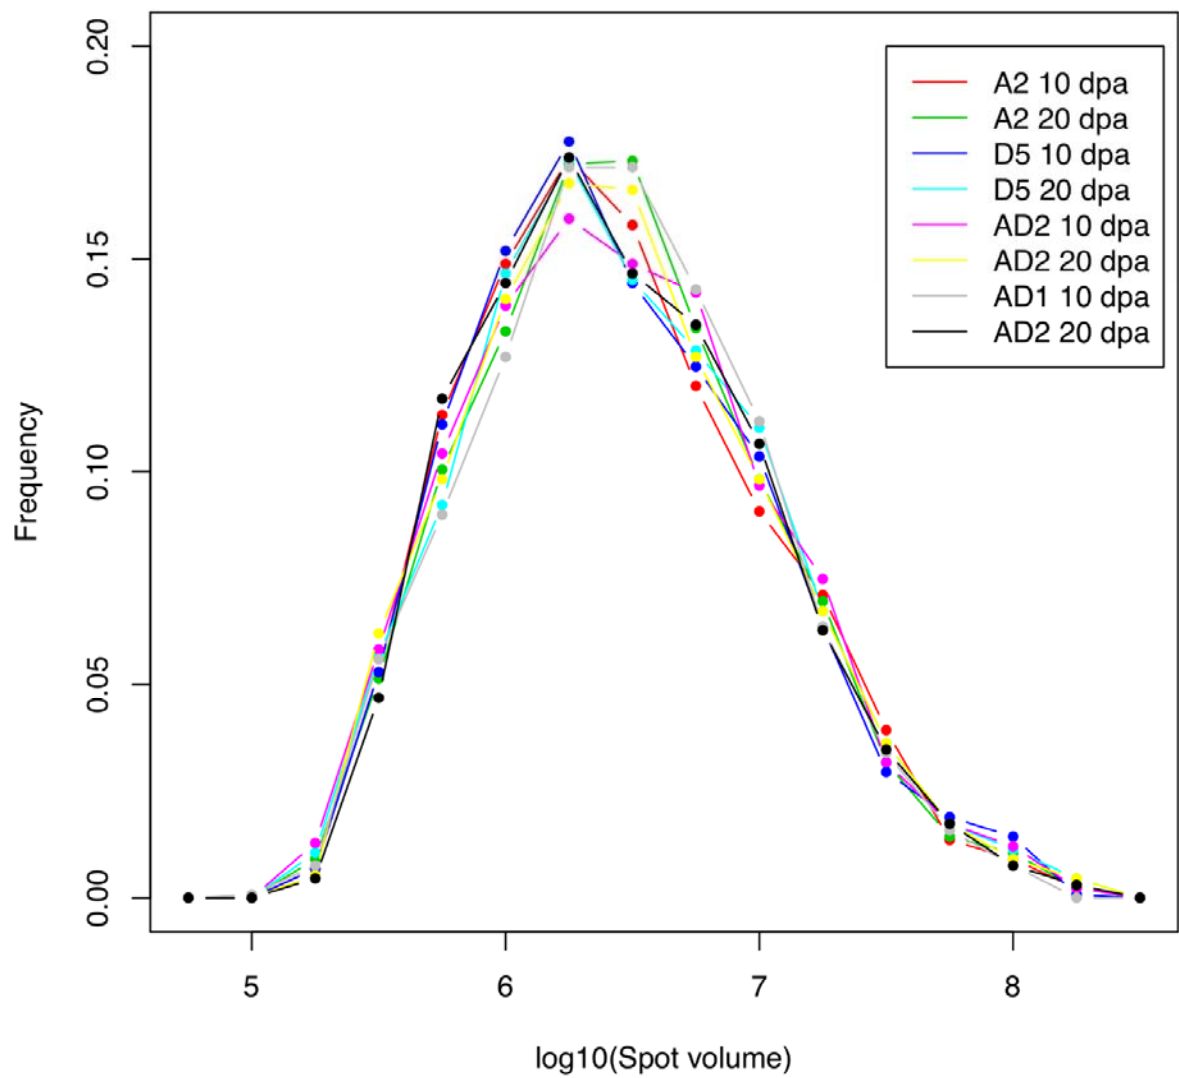

**Figure S2** Frequency distribution plots for 2-DE spot volume

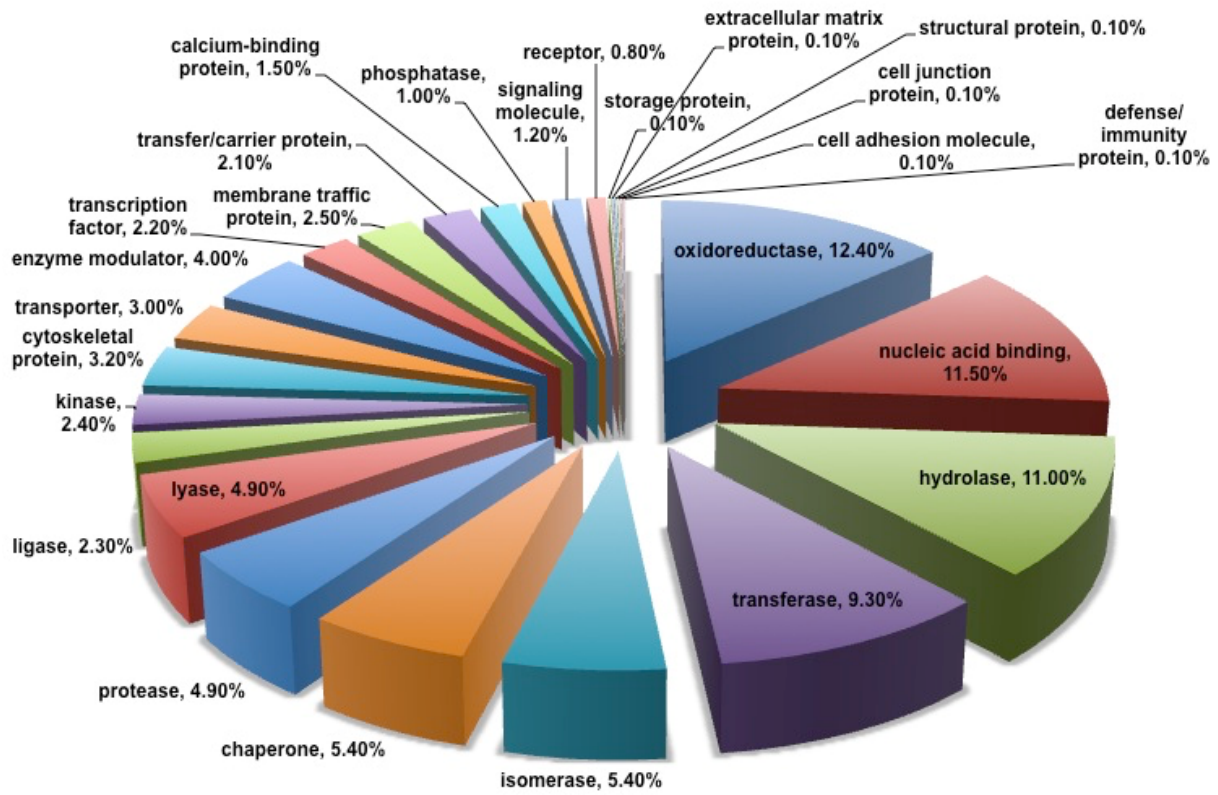

**Figure S3** Panther classification of identified fiber proteins by iTRAQ

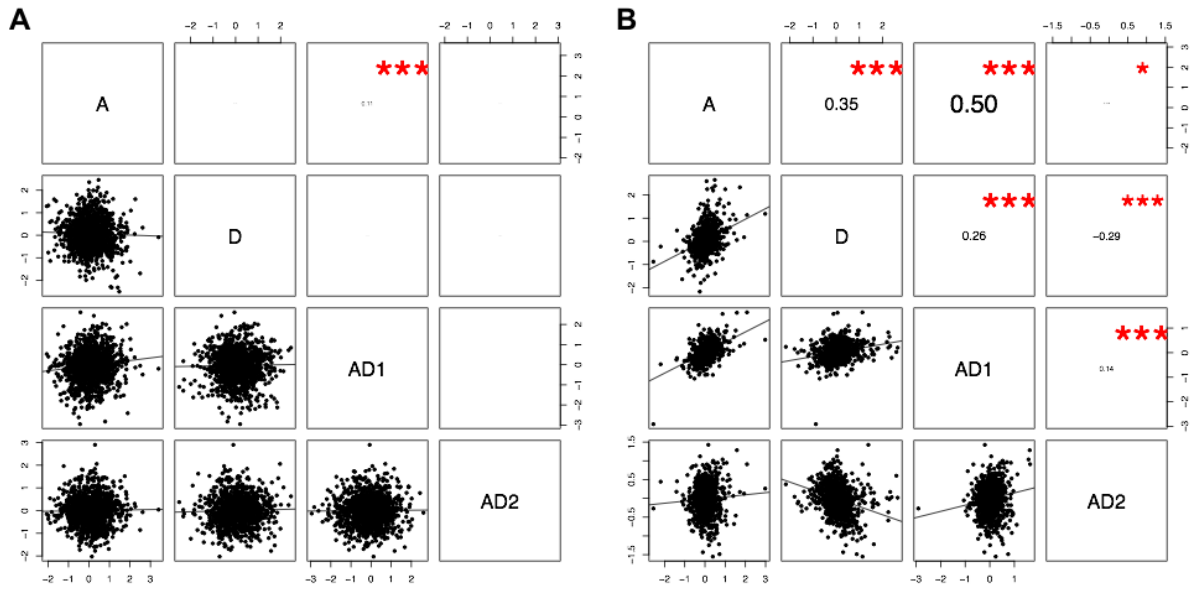

**Figure S4** Pairwise comparison of developmental expression changes among diploid and polyploid cotton. Log<sub>2</sub> expression ratios were calculated for 20 dpa versus 10 dpa within each genome using 2-DE (A) and iTRAQ datasets (B). Lower-left panels of the comparison matrix show scatterplots while upper-right panels give Pearson's correlation coefficients, with the font size proportional to the absolute value of the correlation. Asterisks indicate significance of the adjacent correlation coefficient: \* $P < 0.05$ , \*\* $P < 0.01$ , \*\*\* $P < 0.001$ .

**Table S1 Protein identification and false discovery rate (FDR) analysis**

## a. Number of proteins identified at 95% confidence level

|                    | run 1         | run 2         | run 3         | Total |
|--------------------|---------------|---------------|---------------|-------|
| Total Spectra      | 114654        | 83352         | 110173        |       |
| Spectra Identified | 54020 (47.1%) | 29555 (35.5%) | 46871 (42.5%) |       |
| Distinct Peptides  | 19652         | 10749         | 17250         |       |
| Proteins           | 1483          | 886           | 1339          | 1652  |

## b. Number of proteins estimated according to FDR analysis

| Critical FDR | Local FDR            | Global FDR     | Global FDR from Fit  |
|--------------|----------------------|----------------|----------------------|
| 1.0%         | 1388 836 1085        | 1539 935 1359  | <b>1543 918 1367</b> |
| 5.0%         | <b>1449 853 1270</b> | 1683 1014 1562 | 1689 1025 1552       |
| 10.0%        | <b>1490 887 1331</b> | 1817 1102 1687 | 1830 1111 1699       |

Protein numbers from triplicated experiments were listed; numbers in bold are close to that from protein identification with above 95% confidence level.

## Files S1-S6

Available for download as Excel files at

<http://www.genetics.org/lookup/suppl/doi:10.1534/genetics.115.174367/-/DC1>

- File S1** Normalized spot volumes of 2-DE gels
- File S2** Significant expression changes profiled by 2-DE
- File S3** Protein identification and quantification by ProteinPilot iTRAQ analyses
- File S4** Significant expression changes profiled by iTRAQ
- File S5** GO enrichment analysis
- File S6** Homoeolog-specific peptides and expression changes
