# Supplementary material
Source: PubMed Central journal article supplement (PMC4423384)
Supplement: 10.1534_115.174367_genetics.115.174367-12.pdf [file 10.1534_115.174367_genetics.115.174367-12.pdf]

**Table S1 Protein identification and false discovery rate (FDR) analysis**

## a. Number of proteins identified at 95% confidence level

|                    | run 1         | run 2         | run 3         | Total |
|--------------------|---------------|---------------|---------------|-------|
| Total Spectra      | 114654        | 83352         | 110173        |       |
| Spectra Identified | 54020 (47.1%) | 29555 (35.5%) | 46871 (42.5%) |       |
| Distinct Peptides  | 19652         | 10749         | 17250         |       |
| Proteins           | 1483          | 886           | 1339          | 1652  |

## b. Number of proteins estimated according to FDR analysis

| Critical FDR | Local FDR            | Global FDR     | Global FDR from Fit  |
|--------------|----------------------|----------------|----------------------|
| 1.0%         | 1388 836 1085        | 1539 935 1359  | <b>1543 918 1367</b> |
| 5.0%         | <b>1449 853 1270</b> | 1683 1014 1562 | 1689 1025 1552       |
| 10.0%        | <b>1490 887 1331</b> | 1817 1102 1687 | 1830 1111 1699       |

Protein numbers from triplicated experiments were listed; numbers in bold are close to that from protein identification with above 95% confidence level.
