# Supplementary material
Source: PubMed Central journal article supplement (PMC4423384)

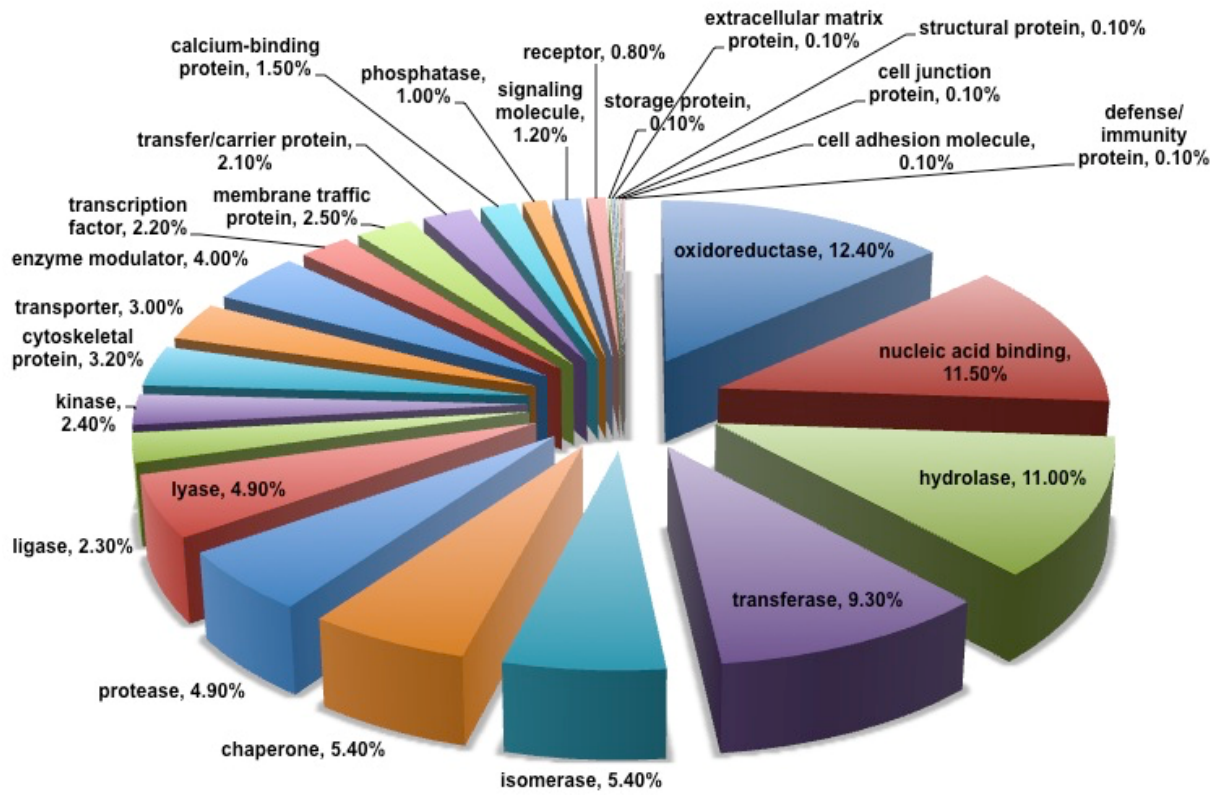

**Figure S3** Panther classification of identified fiber proteins by iTRAQ

Supplement: 10.1534_115.174367_genetics.115.174367-1.pdf [file 10.1534_115.174367_genetics.115.174367-1.pdf]

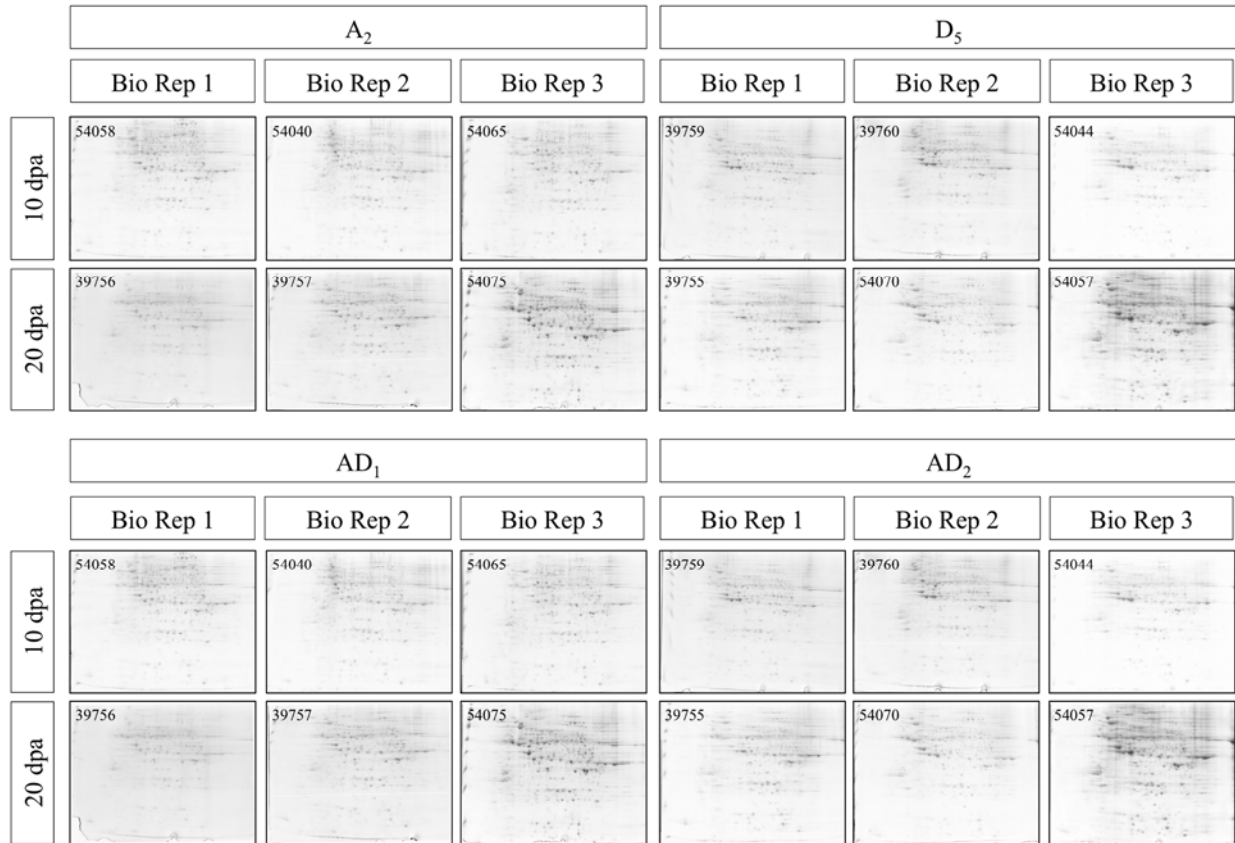

**Figure S1** Images of 2-DE gels

Supplement: 10.1534_115.174367_genetics.115.174367-4.pdf [file 10.1534_115.174367_genetics.115.174367-4.pdf]

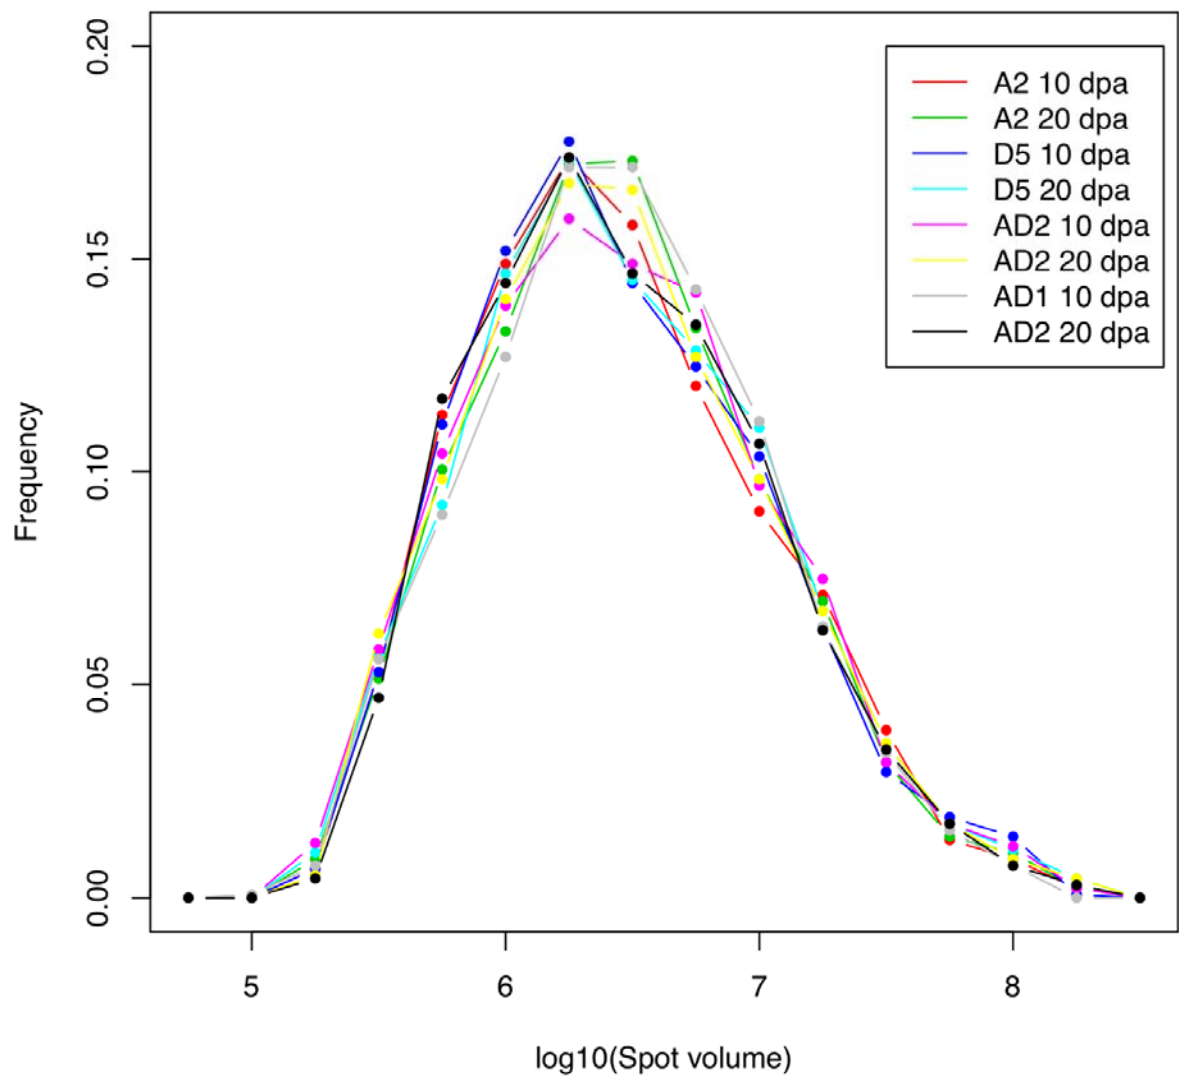

**Figure S2** Frequency distribution plots for 2-DE spot volume

Supplement: 10.1534_115.174367_genetics.115.174367-8.pdf [file 10.1534_115.174367_genetics.115.174367-8.pdf]
